# Supplementary material for: A novel cathodic electrolyte based on H2C2O4 for a stable vanadium redox flow battery with high charge–discharge capacities
Source: Royal Society of Chemistry journal article supplement (doi:10.1039/c3ra44234a), 2013-01-01
Supplement: c3ra44234a.pdf [file c3ra44234a.pdf]

**Electronic Supplementary Information**

**Novel Cathodic Electrolyte Based on H<sub>2</sub>C<sub>2</sub>O<sub>4</sub> for Stable Vanadium Redox Flow  
Battery with High Charge/Discharge Capacities**

Jin Goo Lee<sup>†</sup>, Se Jun Park<sup>†</sup>, Yong Il Cho<sup>†</sup> and Yong Gun Shul<sup>\*</sup>

*Department of Chemical and Bio-molecular Engineering, Yonsei University, 134 Shinchon-dong,  
Seodaemun-gu, Seoul, 120-749, Republic of Korea*

*tel: +82-02-2123-3554; fax: +82-02-393-6594*

*E-mail: [shulyg@yonsei.ac.kr](mailto:shulyg@yonsei.ac.kr)*

## Supplementary Figures

**Table S1.** Cyclic voltammetry data for 1 M V(IV) solution in the sulfuric acid and oxalic acid on the pyrolytic graphite (PG) and carbon felt (CF)

| Sample             | Anodic peak, $I_{pa}$ [mA] | Cathodic peak, $I_{pc}$ [mA] | $\Delta E_p$ [mV] | $I_{pa}/I_{pc}$ |
|--------------------|----------------------------|------------------------------|-------------------|-----------------|
| Sulfuric acid (PG) | 7.946                      | 1.1258                       | 1060              | 7.058           |
| Oxalic acid (PG)   | 15.64                      | 14.51                        | 231               | 1.077           |
| Sulfuric acid (CF) | 94.44                      | 27.34                        | 1002              | 3.454           |
| Oxalic acid (CF)   | 82.32                      | 59.74                        | 824               | 1.377           |

**Table S2.** Physical and electrical information on the carbon felt used in this study

| Item         | Parameter                            |
|--------------|--------------------------------------|
| Model        | GFA-5                                |
| Area weight  | 430 gm <sup>-2</sup>                 |
| Resistivity  | Longit. 2-4 Ωmm<br>Transv. 1.5-3 Ωmm |
| Ash contents | ≤ 0.4 %                              |

**Table S3.** Physical and electrical information on the graphite used in this study

| Item                                      | Parameter                |
|-------------------------------------------|--------------------------|
| Model                                     | G347                     |
| Standard grade                            | TC                       |
| Grade kind                                | Isotropy                 |
| Specific gravity                          | 1.85                     |
| Specific resistance                       | 11.0 $\mu\Omega\text{m}$ |
| Yong's Modulus                            | 10.8 Gpa                 |
| Flexural strength                         | 49.0 Mpa                 |
| Shore hardness                            | 58                       |
| Coefficient of thermal expansion (C.T.E.) | 5.5                      |
| Thermal conductivity                      | 116 $\text{Wmk}^{-1}$    |

**Table S4.** Viscosity of the cathodic electrolytes based on the oxalic acid and sulfuric acid with different vanadium concentrations. (Revolutions per minute: 100 rpm)

| Sample         | 0.1 M V/1 M H <sub>2</sub> SO <sub>4</sub> | 1 M V/1 M H <sub>2</sub> SO <sub>4</sub> | 0.1 M V/1 M H <sub>2</sub> C <sub>2</sub> O <sub>4</sub> | 0.1 M V/1 M H <sub>2</sub> C <sub>2</sub> O <sub>4</sub> |
|----------------|--------------------------------------------|------------------------------------------|----------------------------------------------------------|----------------------------------------------------------|
| Viscosity (cP) | 2.203                                      | 2.596                                    | 2.165                                                    | 2.418                                                    |

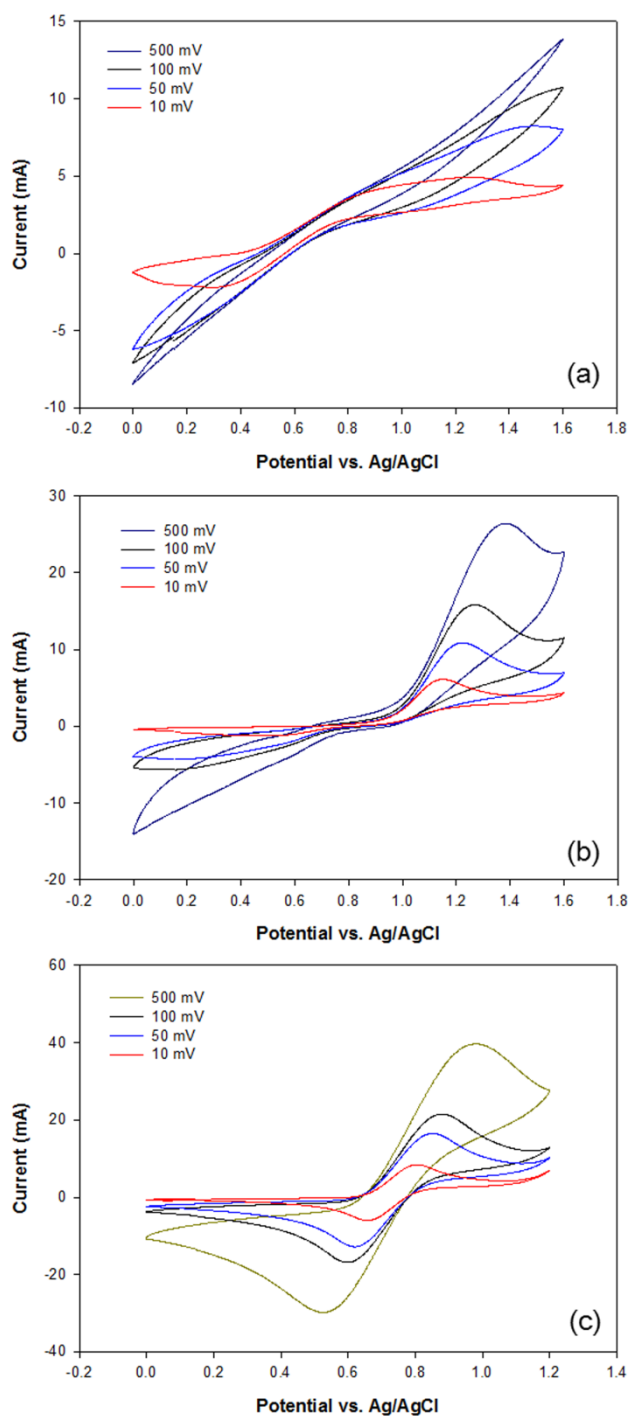

**Figure S1.** Cyclic voltammetry (CV) curves of 0.1 M vanadium solution dissolved in distilled water (a), 1 M sulfuric acid (b), and 1 M oxalic acid (c) at the pyrolytic graphite depending on different scan rates

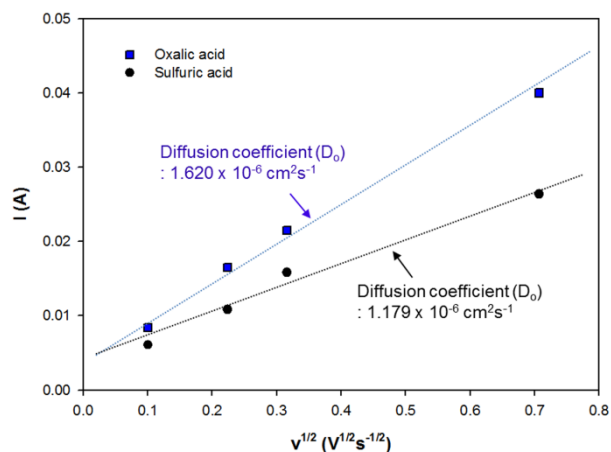

**Figure S2.** Plots of the anodic peak current vs. the square root of scan rates ( $v^{1/2}$ ) for the cathodic electrolytes (0.1 M vanadium) based on 1 M oxalic acid and 1 M sulfuric acid

The diffusion coefficients of the solutions with oxalic acid and sulfuric acid were obtained from following equations, (1) reversible redox couple and (2) irreversible redox couple <sup>[1]</sup>:

$$i_p = 2.69 \times 10^5 n^{3/2} A C D_0^{1/2} v^{1/2} \quad (1)$$

$$i_p = 2.99 \times 10^5 n^{3/2} \alpha^{1/2} A C D_0^{1/2} v^{1/2} \quad (2)$$

where  $i_p$  is the peak current,  $n$  is the number of electrons transferred in the reaction,  $A$  is the working electrode area,  $C$  is the bulk concentration of primary reactant,  $D_0$  is the diffusion coefficient, and  $v$  is the scanning rate.

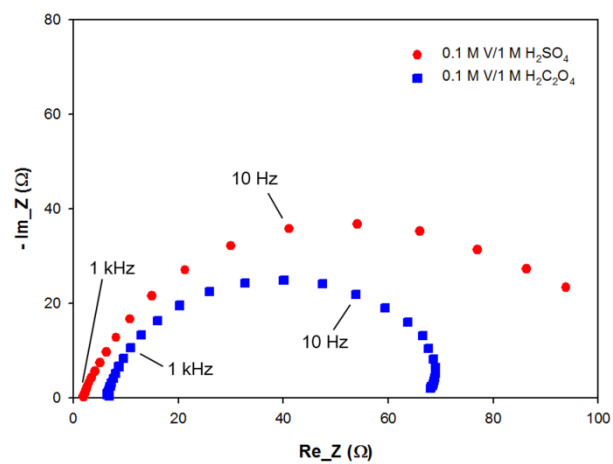

**Figure S3.** Impedance spectra of the cathodic electrolyte based on the oxalic acid and sulfuric acid with the frequency range from 0.1 Hz to 1 MHz (Working and counter electrode: Pt, reference electrode: Ag/AgCl)



## References

1. Z. He, Z. Li, Z. Zhou, F. Tu, Y. Jiang, C. Pan, and S. Liu, *J. Renewable Sustainable Energy* 2013, **5**, 23130
